# Supplementary material for: Atomic Constraints between the Voltage Sensor and the Pore Domain in a Voltage-gated K+ Channel of Known Structure
Source: PubMed Central journal article supplement — J Gen Physiol. 2008 Jun;131(6):549–61. doi: 10.1085/jgp.200809962 (PMC2391244; doi:10.1085/jgp.200809962), 2008-06
Supplement: jgp.200809962_2.pdf [file jgp.200809962_2.pdf]

|      |      |    |     |   |     |        |         |         |      |      |
|------|------|----|-----|---|-----|--------|---------|---------|------|------|
| ATOM | 2249 | CA | SER | A | 324 | 0.503  | -15.610 | -14.810 | 0.00 | 0.00 |
| ATOM | 2260 | CA | MET | A | 325 | 2.413  | -18.689 | -13.462 | 0.00 | 0.00 |
| ATOM | 2277 | CA | ARG | A | 326 | 5.829  | -17.121 | -14.079 | 0.00 | 0.00 |
| ATOM | 2301 | CA | GLU | A | 327 | 5.221  | -13.530 | -12.805 | 0.00 | 0.00 |
| ATOM | 2316 | CA | LEU | A | 328 | 3.323  | -14.784 | -9.695  | 0.00 | 0.00 |
| ATOM | 2335 | CA | GLY | A | 329 | 6.314  | -17.033 | -9.235  | 0.00 | 0.00 |
| ATOM | 2342 | CA | LEU | A | 330 | 8.655  | -13.994 | -9.534  | 0.00 | 0.00 |
| ATOM | 2361 | CA | LEU | A | 331 | 6.473  | -12.255 | -6.673  | 0.00 | 0.00 |
| ATOM | 2380 | CA | ILE | A | 332 | 6.741  | -15.428 | -4.468  | 0.00 | 0.00 |
| ATOM | 2399 | CA | PHE | A | 333 | 10.453 | -15.554 | -5.487  | 0.00 | 0.00 |
| ATOM | 2419 | CA | PHE | A | 334 | 11.672 | -11.996 | -4.689  | 0.00 | 0.00 |
| ATOM | 2439 | CA | LEU | A | 335 | 9.681  | -12.428 | -1.573  | 0.00 | 0.00 |
| ATOM | 2458 | CA | PHE | A | 336 | 11.364 | -15.765 | -0.653  | 0.00 | 0.00 |
| ATOM | 2478 | CA | ILE | A | 337 | 15.012 | -14.618 | -1.292  | 0.00 | 0.00 |
| ATOM | 2497 | CA | GLY | A | 338 | 14.497 | -11.219 | 0.412   | 0.00 | 0.00 |
| ATOM | 2504 | CA | VAL | A | 339 | 12.525 | -12.881 | 3.254   | 0.00 | 0.00 |
| ATOM | 2520 | CA | ILE | A | 340 | 15.201 | -15.453 | 3.993   | 0.00 | 0.00 |
| ATOM | 2539 | CA | LEU | A | 341 | 17.920 | -12.639 | 4.006   | 0.00 | 0.00 |
| ATOM | 2558 | CA | PHE | A | 342 | 16.175 | -10.224 | 6.399   | 0.00 | 0.00 |
| ATOM | 2578 | CA | SER | A | 343 | 14.910 | -13.208 | 8.612   | 0.00 | 0.00 |
| ATOM | 2589 | CA | SER | A | 344 | 18.571 | -14.403 | 8.872   | 0.00 | 0.00 |
| ATOM | 2600 | CA | ALA | A | 345 | 19.627 | -10.898 | 9.669   | 0.00 | 0.00 |
| ATOM | 2610 | CA | VAL | A | 346 | 17.266 | -10.241 | 12.677  | 0.00 | 0.00 |
| ATOM | 2626 | CA | TYR | A | 347 | 17.552 | -13.875 | 13.999  | 0.00 | 0.00 |
| ATOM | 2647 | CA | PHE | A | 348 | 21.302 | -14.208 | 14.179  | 0.00 | 0.00 |
| ATOM | 2667 | CA | ALA | A | 349 | 22.127 | -10.621 | 15.074  | 0.00 | 0.00 |
| ATOM | 2677 | CA | GLU | A | 350 | 19.561 | -10.577 | 17.862  | 0.00 | 0.00 |
| ATOM | 2692 | CA | HIS | A | 351 | 20.865 | -12.233 | 20.983  | 0.00 | 0.00 |
| ATOM | 2708 | CA | GLY | A | 352 | 20.236 | -12.304 | 24.791  | 0.00 | 0.00 |
| ATOM | 2715 | CA | SER | A | 353 | 20.471 | -13.862 | 28.247  | 0.00 | 0.00 |
| ATOM | 2726 | CA | ARG | A | 354 | 17.620 | -15.465 | 30.290  | 0.00 | 0.00 |
| ATOM | 2750 | CA | ASP | A | 355 | 14.586 | -14.114 | 28.459  | 0.00 | 0.00 |
| ATOM | 2762 | CA | SER | A | 356 | 14.654 | -14.968 | 24.773  | 0.00 | 0.00 |
| ATOM | 2773 | CA | GLN | A | 357 | 14.087 | -12.350 | 22.018  | 0.00 | 0.00 |
| ATOM | 2790 | CA | PHE | A | 358 | 12.161 | -14.887 | 19.880  | 0.00 | 0.00 |
| ATOM | 2812 | CA | PRO | A | 359 | 10.147 | -17.717 | 21.229  | 0.00 | 0.00 |
| ATOM | 2824 | CA | SER | A | 360 | 10.800 | -19.808 | 17.983  | 0.00 | 0.00 |
| ATOM | 2835 | CA | ILE | A | 361 | 11.615 | -19.374 | 14.254  | 0.00 | 0.00 |
| ATOM | 2856 | CA | PRO | A | 362 | 8.144  | -18.717 | 12.665  | 0.00 | 0.00 |
| ATOM | 2868 | CA | ASP | A | 363 | 8.066  | -15.349 | 14.644  | 0.00 | 0.00 |
| ATOM | 2880 | CA | ALA | A | 364 | 11.268 | -14.240 | 12.910  | 0.00 | 0.00 |
| ATOM | 2890 | CA | PHE | A | 365 | 9.823  | -15.141 | 9.624   | 0.00 | 0.00 |
| ATOM | 2910 | CA | TRP | A | 366 | 6.558  | -13.430 | 10.622  | 0.00 | 0.00 |
| ATOM | 2934 | CA | TRP | A | 367 | 8.248  | -10.212 | 11.732  | 0.00 | 0.00 |
| ATOM | 2958 | CA | ALA | A | 368 | 10.421 | -10.221 | 8.521   | 0.00 | 0.00 |
| ATOM | 2968 | CA | VAL | A | 369 | 7.428  | -10.881 | 6.245   | 0.00 | 0.00 |
| ATOM | 2984 | CA | VAL | A | 370 | 5.277  | -8.227  | 7.909   | 0.00 | 0.00 |
| ATOM | 3000 | CA | SER | A | 371 | 8.296  | -5.811  | 7.478   | 0.00 | 0.00 |
| ATOM | 3011 | CA | MET | A | 372 | 8.941  | -6.866  | 3.900   | 0.00 | 0.00 |
| ATOM | 3028 | CA | THR | A | 373 | 5.316  | -6.321  | 2.913   | 0.00 | 0.00 |
| ATOM | 3042 | CA | THR | A | 374 | 3.588  | -2.889  | 3.561   | 0.00 | 0.00 |
| ATOM | 3056 | CA | VAL | A | 375 | 1.556  | -4.138  | 6.603   | 0.00 | 0.00 |
| ATOM | 3072 | CA | GLY | A | 376 | 3.483  | -3.954  | 10.002  | 0.00 | 0.00 |
| ATOM | 3079 | CA | TYR | A | 377 | 1.996  | -4.582  | 13.550  | 0.00 | 0.00 |
| ATOM | 3100 | CA | GLY | A | 378 | 4.839  | -3.660  | 15.856  | 0.00 | 0.00 |
| ATOM | 3107 | CA | ASP | A | 379 | 6.247  | -6.243  | 18.226  | 0.00 | 0.00 |
| ATOM | 3119 | CA | MET | A | 380 | 10.126 | -6.497  | 18.381  | 0.00 | 0.00 |
| ATOM | 3136 | CA | VAL | A | 381 | 11.410 | -2.930  | 19.102  | 0.00 | 0.00 |
| ATOM | 3154 | CA | PRO | A | 382 | 14.735 | -1.940  | 17.142  | 0.00 | 0.00 |
| ATOM | 3166 | CA | THR | A | 383 | 15.816 | -0.055  | 20.306  | 0.00 | 0.00 |
| ATOM | 3180 | CA | THR | A | 384 | 19.357 | 0.693   | 19.171  | 0.00 | 0.00 |
| ATOM | 3194 | CA | ILE | A | 385 | 20.947 | 1.667   | 15.701  | 0.00 | 0.00 |
| ATOM | 3213 | CA | GLY | A | 386 | 21.719 | -1.742  | 14.234  | 0.00 | 0.00 |
| ATOM | 3220 | CA | GLY | A | 387 | 18.175 | -3.063  | 14.886  | 0.00 | 0.00 |

|      |      |    |     |   |     |         |         |         |      |      |
|------|------|----|-----|---|-----|---------|---------|---------|------|------|
| ATOM | 3227 | CA | LYS | A | 388 | 16.871  | -0.015  | 13.068  | 0.00 | 0.00 |
| ATOM | 3249 | CA | ILE | A | 389 | 19.324  | -0.559  | 9.942   | 0.00 | 0.00 |
| ATOM | 3268 | CA | VAL | A | 390 | 18.171  | -4.209  | 9.186   | 0.00 | 0.00 |
| ATOM | 3284 | CA | GLY | A | 391 | 14.567  | -2.985  | 9.631   | 0.00 | 0.00 |
| ATOM | 3291 | CA | SER | A | 392 | 15.256  | -0.068  | 7.328   | 0.00 | 0.00 |
| ATOM | 3302 | CA | LEU | A | 393 | 16.741  | -2.302  | 4.647   | 0.00 | 0.00 |
| ATOM | 3321 | CA | CYS | A | 394 | 13.854  | -4.768  | 4.912   | 0.00 | 0.00 |
| ATOM | 3332 | CA | ALA | A | 395 | 11.393  | -1.862  | 4.106   | 0.00 | 0.00 |
| ATOM | 3342 | CA | ILE | A | 396 | 13.588  | 0.043   | 1.446   | 0.00 | 0.00 |
| ATOM | 3361 | CA | ALA | A | 397 | 14.245  | -3.411  | -0.055  | 0.00 | 0.00 |
| ATOM | 3371 | CA | GLY | A | 398 | 10.482  | -4.515  | -0.229  | 0.00 | 0.00 |
| ATOM | 3378 | CA | VAL | A | 399 | 9.307   | -1.419  | -2.106  | 0.00 | 0.00 |
| ATOM | 3394 | CA | LEU | A | 400 | 12.219  | -1.814  | -4.536  | 0.00 | 0.00 |
| ATOM | 3413 | CA | THR | A | 401 | 11.889  | -5.597  | -5.075  | 0.00 | 0.00 |
| ATOM | 3427 | CA | ILE | A | 402 | 8.506   | -7.331  | -4.637  | 0.00 | 0.00 |
| ATOM | 3446 | CA | ALA | A | 403 | 6.444   | -4.373  | -6.009  | 0.00 | 0.00 |
| ATOM | 3456 | CA | LEU | A | 404 | 7.775   | -4.669  | -9.594  | 0.00 | 0.00 |
| ATOM | 3477 | CA | PRO | A | 405 | 5.901   | -7.964  | -10.684 | 0.00 | 0.00 |
| ATOM | 3489 | CA | VAL | A | 406 | 2.590   | -6.691  | -9.050  | 0.00 | 0.00 |
| ATOM | 3507 | CA | PRO | A | 407 | 1.668   | -4.313  | -11.980 | 0.00 | 0.00 |
| ATOM | 3519 | CA | VAL | A | 408 | 2.566   | -7.213  | -14.314 | 0.00 | 0.00 |
| ATOM | 3535 | CA | ILE | A | 409 | 0.064   | -9.566  | -12.814 | 0.00 | 0.00 |
| ATOM | 3554 | CA | VAL | A | 410 | -2.607  | -6.806  | -12.695 | 0.00 | 0.00 |
| ATOM | 3570 | CA | SER | A | 411 | -1.796  | -6.253  | -16.414 | 0.00 | 0.00 |
| ATOM | 3581 | CA | ASN | A | 412 | -2.723  | -9.924  | -17.136 | 0.00 | 0.00 |
| ATOM | 3595 | CA | PHE | A | 413 | -5.987  | -9.463  | -15.175 | 0.00 | 0.00 |
| ATOM | 3615 | CA | ASN | A | 414 | -7.030  | -6.274  | -17.081 | 0.00 | 0.00 |
| ATOM | 3629 | CA | TYR | A | 415 | -5.872  | -8.029  | -20.332 | 0.00 | 0.00 |
| ATOM | 3650 | CA | PHE | A | 416 | -8.419  | -10.702 | -19.662 | 0.00 | 0.00 |
| ATOM | 3670 | CA | TYR | A | 417 | -11.036 | -8.219  | -18.146 | 0.00 | 0.00 |
| ATOM | 3691 | CA | HIS | A | 418 | -10.819 | -5.922  | -21.101 | 0.00 | 0.00 |
| ATOM | 3709 | CA | ARG | A | 419 | -11.139 | -8.947  | -23.413 | 0.00 | 0.00 |
| ATOM | 3733 | CA | GLU | A | 420 | -14.477 | -9.788  | -21.836 | 0.00 | 0.00 |
| ATOM | 3748 | CA | THR | A | 421 | -17.350 | -7.420  | -21.602 | 0.00 | 0.00 |
| ATOM | 6009 | CA | SER | B | 324 | -17.223 | 1.805   | -11.897 | 0.00 | 0.00 |
| ATOM | 6020 | CA | MET | B | 325 | -19.819 | 0.221   | -9.543  | 0.00 | 0.00 |
| ATOM | 6037 | CA | ARG | B | 326 | -19.331 | -3.399  | -10.927 | 0.00 | 0.00 |
| ATOM | 6061 | CA | GLU | B | 327 | -15.513 | -3.003  | -10.683 | 0.00 | 0.00 |
| ATOM | 6076 | CA | LEU | B | 328 | -15.945 | -1.378  | -7.171  | 0.00 | 0.00 |
| ATOM | 6095 | CA | GLY | B | 329 | -18.446 | -4.216  | -6.238  | 0.00 | 0.00 |
| ATOM | 6102 | CA | LEU | B | 330 | -16.120 | -7.034  | -7.537  | 0.00 | 0.00 |
| ATOM | 6121 | CA | LEU | B | 331 | -13.266 | -5.475  | -5.486  | 0.00 | 0.00 |
| ATOM | 6140 | CA | ILE | B | 332 | -15.527 | -5.403  | -2.358  | 0.00 | 0.00 |
| ATOM | 6159 | CA | PHE | B | 333 | -16.664 | -8.942  | -3.110  | 0.00 | 0.00 |
| ATOM | 6179 | CA | PHE | B | 334 | -13.340 | -10.720 | -3.213  | 0.00 | 0.00 |
| ATOM | 6199 | CA | LEU | B | 335 | -12.028 | -8.748  | -0.122  | 0.00 | 0.00 |
| ATOM | 6218 | CA | PHE | B | 336 | -15.196 | -9.419  | 2.058   | 0.00 | 0.00 |
| ATOM | 6238 | CA | ILE | B | 337 | -15.140 | -13.156 | 0.945   | 0.00 | 0.00 |
| ATOM | 6257 | CA | GLY | B | 338 | -11.345 | -13.198 | 1.901   | 0.00 | 0.00 |
| ATOM | 6264 | CA | VAL | B | 339 | -12.050 | -11.408 | 5.136   | 0.00 | 0.00 |
| ATOM | 6280 | CA | ILE | B | 340 | -14.922 | -13.716 | 6.087   | 0.00 | 0.00 |
| ATOM | 6299 | CA | LEU | B | 341 | -12.801 | -16.869 | 5.299   | 0.00 | 0.00 |
| ATOM | 6318 | CA | PHE | B | 342 | -9.440  | -15.724 | 6.861   | 0.00 | 0.00 |
| ATOM | 6338 | CA | SER | B | 343 | -11.569 | -14.682 | 9.916   | 0.00 | 0.00 |
| ATOM | 6349 | CA | SER | B | 344 | -12.966 | -18.240 | 10.029  | 0.00 | 0.00 |
| ATOM | 6360 | CA | ALA | B | 345 | -9.430  | -19.717 | 9.703   | 0.00 | 0.00 |
| ATOM | 6370 | CA | VAL | B | 346 | -7.623  | -17.583 | 12.382  | 0.00 | 0.00 |
| ATOM | 6386 | CA | TYR | B | 347 | -10.693 | -18.621 | 14.719  | 0.00 | 0.00 |
| ATOM | 6407 | CA | PHE | B | 348 | -10.320 | -22.240 | 14.027  | 0.00 | 0.00 |
| ATOM | 6427 | CA | ALA | B | 349 | -6.428  | -22.081 | 14.355  | 0.00 | 0.00 |
| ATOM | 6437 | CA | VAL | B | 350 | -6.139  | -19.913 | 17.507  | 0.00 | 0.00 |
| ATOM | 6452 | CA | HIS | B | 351 | -8.538  | -21.931 | 19.520  | 0.00 | 0.00 |
| ATOM | 6468 | CA | GLY | B | 352 | -7.889  | -23.440 | 22.980  | 0.00 | 0.00 |
| ATOM | 6475 | CA | SER | B | 353 | -4.761  | -21.597 | 24.241  | 0.00 | 0.00 |

|      |      |    |     |   |     |         |         |         |      |      |
|------|------|----|-----|---|-----|---------|---------|---------|------|------|
| ATOM | 6486 | CA | ARG | B | 354 | -5.022  | -19.973 | 27.715  | 0.00 | 0.00 |
| ATOM | 6510 | CA | ASP | B | 355 | -8.256  | -18.501 | 29.033  | 0.00 | 0.00 |
| ATOM | 6522 | CA | SER | B | 356 | -11.298 | -19.602 | 26.949  | 0.00 | 0.00 |
| ATOM | 6533 | CA | GLN | B | 357 | -11.706 | -22.152 | 24.157  | 0.00 | 0.00 |
| ATOM | 6550 | CA | PHE | B | 358 | -13.521 | -20.431 | 21.230  | 0.00 | 0.00 |
| ATOM | 6572 | CA | PRO | B | 359 | -12.091 | -16.784 | 20.800  | 0.00 | 0.00 |
| ATOM | 6584 | CA | SER | B | 360 | -14.058 | -13.526 | 19.934  | 0.00 | 0.00 |
| ATOM | 6595 | CA | ILE | B | 361 | -15.753 | -13.180 | 16.537  | 0.00 | 0.00 |
| ATOM | 6616 | CA | PRO | B | 362 | -15.687 | -9.241  | 16.204  | 0.00 | 0.00 |
| ATOM | 6628 | CA | ASP | B | 363 | -11.891 | -9.118  | 16.898  | 0.00 | 0.00 |
| ATOM | 6640 | CA | ALA | B | 364 | -11.349 | -11.775 | 14.155  | 0.00 | 0.00 |
| ATOM | 6650 | CA | PHE | B | 365 | -13.429 | -9.663  | 11.700  | 0.00 | 0.00 |
| ATOM | 6670 | CA | TRP | B | 366 | -11.358 | -6.564  | 12.686  | 0.00 | 0.00 |
| ATOM | 6694 | CA | TRP | B | 367 | -8.046  | -8.529  | 12.527  | 0.00 | 0.00 |
| ATOM | 6718 | CA | ALA | B | 368 | -8.928  | -9.786  | 8.974   | 0.00 | 0.00 |
| ATOM | 6728 | CA | VAL | B | 369 | -10.462 | -6.598  | 7.487   | 0.00 | 0.00 |
| ATOM | 6744 | CA | VAL | B | 370 | -7.570  | -4.329  | 8.611   | 0.00 | 0.00 |
| ATOM | 6760 | CA | SER | B | 371 | -4.748  | -6.820  | 7.579   | 0.00 | 0.00 |
| ATOM | 6771 | CA | MET | B | 372 | -6.196  | -7.393  | 4.068   | 0.00 | 0.00 |
| ATOM | 6788 | CA | THR | B | 373 | -6.717  | -3.703  | 3.434   | 0.00 | 0.00 |
| ATOM | 6802 | CA | THR | B | 374 | -2.910  | -3.697  | 4.016   | 0.00 | 0.00 |
| ATOM | 6816 | CA | VAL | B | 375 | -3.278  | -1.324  | 7.087   | 0.00 | 0.00 |
| ATOM | 6832 | CA | GLY | B | 376 | -2.077  | -3.348  | 10.192  | 0.00 | 0.00 |
| ATOM | 6839 | CA | TYR | B | 377 | -2.694  | -2.193  | 13.739  | 0.00 | 0.00 |
| ATOM | 6860 | CA | GLY | B | 378 | -1.594  | -4.488  | 16.520  | 0.00 | 0.00 |
| ATOM | 6867 | CA | ASP | B | 379 | -4.693  | -5.817  | 18.327  | 0.00 | 0.00 |
| ATOM | 6879 | CA | MET | B | 380 | -5.507  | -9.483  | 17.809  | 0.00 | 0.00 |
| ATOM | 6896 | CA | VAL | B | 381 | -2.483  | -11.735 | 17.969  | 0.00 | 0.00 |
| ATOM | 6914 | CA | PRO | B | 382 | -1.851  | -14.882 | 15.853  | 0.00 | 0.00 |
| ATOM | 6926 | CA | THR | B | 383 | 0.240   | -16.692 | 18.492  | 0.00 | 0.00 |
| ATOM | 6940 | CA | THR | B | 384 | 0.439   | -20.206 | 16.953  | 0.00 | 0.00 |
| ATOM | 6954 | CA | ILE | B | 385 | 2.168   | -21.335 | 13.715  | 0.00 | 0.00 |
| ATOM | 6973 | CA | GLY | B | 386 | -1.030  | -21.628 | 11.575  | 0.00 | 0.00 |
| ATOM | 6980 | CA | GLY | B | 387 | -2.035  | -18.079 | 12.592  | 0.00 | 0.00 |
| ATOM | 6987 | CA | LYS | B | 388 | 1.128   | -16.840 | 10.909  | 0.00 | 0.00 |
| ATOM | 7009 | CA | ILE | B | 389 | 0.280   | -19.037 | 7.815   | 0.00 | 0.00 |
| ATOM | 7028 | CA | VAL | B | 390 | -3.234  | -17.624 | 7.501   | 0.00 | 0.00 |
| ATOM | 7044 | CA | GLY | B | 391 | -1.889  | -14.070 | 8.421   | 0.00 | 0.00 |
| ATOM | 7051 | CA | SER | B | 392 | 0.813   | -14.083 | 5.770   | 0.00 | 0.00 |
| ATOM | 7062 | CA | LEU | B | 393 | -1.690  | -15.119 | 3.117   | 0.00 | 0.00 |
| ATOM | 7081 | CA | CYS | B | 394 | -4.268  | -12.517 | 4.174   | 0.00 | 0.00 |
| ATOM | 7092 | CA | ALA | B | 395 | -1.722  | -9.825  | 3.380   | 0.00 | 0.00 |
| ATOM | 7102 | CA | ILE | B | 396 | -0.111  | -10.977 | 0.155   | 0.00 | 0.00 |
| ATOM | 7121 | CA | ALA | B | 397 | -3.543  | -11.834 | -1.217  | 0.00 | 0.00 |
| ATOM | 7131 | CA | GLY | B | 398 | -4.789  | -8.379  | 0.069   | 0.00 | 0.00 |
| ATOM | 7138 | CA | VAL | B | 399 | -2.061  | -6.289  | -1.530  | 0.00 | 0.00 |
| ATOM | 7154 | CA | LEU | B | 400 | -2.564  | -7.939  | -4.897  | 0.00 | 0.00 |
| ATOM | 7173 | CA | THR | B | 401 | -6.457  | -7.876  | -4.675  | 0.00 | 0.00 |
| ATOM | 7187 | CA | ILE | B | 402 | -6.453  | -4.130  | -4.032  | 0.00 | 0.00 |
| ATOM | 7206 | CA | ALA | B | 403 | -4.514  | -3.518  | -7.372  | 0.00 | 0.00 |
| ATOM | 7216 | CA | LEU | B | 404 | -6.852  | -5.725  | -9.538  | 0.00 | 0.00 |
| ATOM | 7237 | CA | PRO | B | 405 | -9.834  | -3.736  | -11.071 | 0.00 | 0.00 |
| ATOM | 7249 | CA | VAL | B | 406 | -8.169  | -0.427  | -10.460 | 0.00 | 0.00 |
| ATOM | 7267 | CA | PRO | B | 407 | -6.746  | 0.098   | -13.953 | 0.00 | 0.00 |
| ATOM | 7279 | CA | VAL | B | 408 | -10.315 | 0.273   | -15.209 | 0.00 | 0.00 |
| ATOM | 7295 | CA | ILE | B | 409 | -11.304 | 2.843   | -12.573 | 0.00 | 0.00 |
| ATOM | 7314 | CA | VAL | B | 410 | -8.266  | 4.805   | -13.614 | 0.00 | 0.00 |
| ATOM | 7330 | CA | SER | B | 411 | -9.397  | 4.560   | -17.292 | 0.00 | 0.00 |
| ATOM | 7341 | CA | ASN | B | 412 | -12.817 | 5.873   | -16.001 | 0.00 | 0.00 |
| ATOM | 7355 | CA | PHE | B | 413 | -11.386 | 8.891   | -14.139 | 0.00 | 0.00 |
| ATOM | 7375 | CA | ASN | B | 414 | -9.594  | 9.902   | -17.272 | 0.00 | 0.00 |
| ATOM | 7389 | CA | TYR | B | 415 | -12.822 | 9.598   | -19.314 | 0.00 | 0.00 |
| ATOM | 7410 | CA | PHE | B | 416 | -15.078 | 11.605  | -17.163 | 0.00 | 0.00 |
| ATOM | 7430 | CA | TYR | B | 417 | -12.362 | 14.254  | -16.570 | 0.00 | 0.00 |

|      |      |     |     |   |     |         |        |         |      |      |
|------|------|-----|-----|---|-----|---------|--------|---------|------|------|
| ATOM | 7451 | CA  | HIS | B | 418 | -11.577 | 14.469 | -20.303 | 0.00 | 0.00 |
| ATOM | 7469 | CA  | ARG | B | 419 | -15.251 | 14.670 | -21.528 | 0.00 | 0.00 |
| ATOM | 7493 | CA  | GLU | B | 420 | -16.453 | 17.440 | -19.163 | 0.00 | 0.00 |
| ATOM | 7508 | CA  | THR | B | 421 | -14.388 | 20.812 | -19.218 | 0.00 | 0.00 |
| ATOM | 9134 | CA  | ALA | C | 287 | 24.441  | 35.210 | 20.230  | 0.00 | 0.00 |
| ATOM | 9144 | CA  | MET | C | 288 | 23.990  | 33.301 | 22.724  | 0.00 | 0.00 |
| ATOM | 9161 | CA  | SER | C | 289 | 21.565  | 30.304 | 22.643  | 0.00 | 0.00 |
| ATOM | 9172 | CA  | LEU | C | 290 | 17.753  | 30.669 | 21.726  | 0.00 | 0.00 |
| ATOM | 9191 | CA  | ALA | C | 291 | 17.861  | 32.626 | 18.451  | 0.00 | 0.00 |
| ATOM | 9201 | CA  | ILE | C | 292 | 21.081  | 31.256 | 17.043  | 0.00 | 0.00 |
| ATOM | 9220 | CA  | LEU | C | 293 | 20.001  | 27.531 | 17.562  | 0.00 | 0.00 |
| ATOM | 9237 | N   | HIS | C | 294 | 18.060  | 28.317 | 16.311  | 0.00 | 0.00 |
| ATOM | 9238 | HN  | HIS | C | 294 | 18.162  | 29.155 | 16.842  | 0.00 | 0.00 |
| ATOM | 9239 | CA  | HIS | C | 294 | 16.991  | 28.397 | 15.297  | 0.00 | 0.00 |
| ATOM | 9240 | HA  | HIS | C | 294 | 16.485  | 27.444 | 15.256  | 0.00 | 0.00 |
| ATOM | 9241 | CB  | HIS | C | 294 | 15.846  | 29.438 | 15.721  | 0.00 | 0.00 |
| ATOM | 9242 | HB1 | HIS | C | 294 | 16.266  | 30.402 | 16.081  | 0.00 | 0.00 |
| ATOM | 9243 | HB2 | HIS | C | 294 | 15.151  | 29.574 | 14.866  | 0.00 | 0.00 |
| ATOM | 9244 | ND1 | HIS | C | 294 | 14.406  | 27.628 | 16.742  | 0.00 | 0.00 |
| ATOM | 9245 | CG  | HIS | C | 294 | 14.901  | 28.922 | 16.822  | 0.00 | 0.00 |
| ATOM | 9246 | CE1 | HIS | C | 294 | 13.476  | 27.616 | 17.698  | 0.00 | 0.00 |
| ATOM | 9247 | HE1 | HIS | C | 294 | 12.811  | 26.755 | 17.753  | 0.00 | 0.00 |
| ATOM | 9248 | NE2 | HIS | C | 294 | 13.367  | 28.724 | 18.447  | 0.00 | 0.00 |
| ATOM | 9249 | CD2 | HIS | C | 294 | 14.236  | 29.604 | 17.761  | 0.00 | 0.00 |
| ATOM | 9250 | HD2 | HIS | C | 294 | 14.336  | 30.645 | 18.046  | 0.00 | 0.00 |
| ATOM | 9251 | C   | HIS | C | 294 | 17.467  | 28.586 | 13.873  | 0.00 | 0.00 |
| ATOM | 9252 | O   | HIS | C | 294 | 16.876  | 28.116 | 12.892  | 0.00 | 0.00 |
| ATOM | 9255 | CA  | VAL | C | 295 | 19.109  | 29.795 | 12.493  | 0.00 | 0.00 |
| ATOM | 9271 | CA  | ILE | C | 296 | 21.738  | 27.037 | 12.596  | 0.00 | 0.00 |
| ATOM | 9290 | CA  | ARG | C | 297 | 19.181  | 24.216 | 12.145  | 0.00 | 0.00 |
| ATOM | 9314 | CA  | LEU | C | 298 | 17.665  | 25.939 | 9.004   | 0.00 | 0.00 |
| ATOM | 9333 | CA  | VAL | C | 299 | 20.862  | 26.543 | 7.111   | 0.00 | 0.00 |
| ATOM | 9349 | CA  | ARG | C | 300 | 21.799  | 22.958 | 7.843   | 0.00 | 0.00 |
| ATOM | 9373 | CA  | VAL | C | 301 | 18.648  | 21.575 | 6.154   | 0.00 | 0.00 |
| ATOM | 9389 | CA  | PHE | C | 302 | 19.083  | 23.966 | 3.234   | 0.00 | 0.00 |
| ATOM | 9409 | CA  | ARG | C | 303 | 22.646  | 22.419 | 2.332   | 0.00 | 0.00 |
| ATOM | 9433 | CA  | ILE | C | 304 | 21.730  | 19.512 | -0.118  | 0.00 | 0.00 |
| ATOM | 9452 | CA  | PHE | C | 305 | 19.216  | 21.819 | -1.958  | 0.00 | 0.00 |
| ATOM | 9472 | CA  | LYS | C | 306 | 21.838  | 24.466 | -2.463  | 0.00 | 0.00 |
| ATOM | 9494 | CA  | LEU | C | 307 | 24.230  | 21.931 | -4.140  | 0.00 | 0.00 |
| ATOM | 9513 | CA  | SER | C | 308 | 21.102  | 20.842 | -6.200  | 0.00 | 0.00 |
| ATOM | 9524 | CA  | ARG | C | 309 | 20.586  | 24.455 | -7.267  | 0.00 | 0.00 |
| ATOM | 9548 | CA  | HIS | C | 310 | 21.461  | 24.116 | -10.998 | 0.00 | 0.00 |
| ATOM | 9566 | CA  | SER | C | 311 | 20.363  | 20.446 | -11.311 | 0.00 | 0.00 |
| ATOM | 9577 | CA  | LYS | C | 312 | 17.291  | 19.526 | -13.399 | 0.00 | 0.00 |
| ATOM | 9599 | CA  | GLY | C | 313 | 15.614  | 16.897 | -11.063 | 0.00 | 0.00 |
| ATOM | 9606 | CA  | LEU | C | 314 | 14.082  | 19.275 | -8.445  | 0.00 | 0.00 |
| ATOM | 9625 | CA  | GLN | C | 315 | 13.529  | 22.086 | -11.042 | 0.00 | 0.00 |
| ATOM | 9642 | CA  | ILE | C | 316 | 11.494  | 19.494 | -13.122 | 0.00 | 0.00 |
| ATOM | 9661 | CA  | LEU | C | 317 | 9.531   | 18.579 | -9.830  | 0.00 | 0.00 |
| ATOM | 9680 | CA  | GLY | C | 318 | 9.012   | 22.396 | -9.244  | 0.00 | 0.00 |
| ATOM | 9687 | CA  | GLN | C | 319 | 7.806   | 22.643 | -12.836 | 0.00 | 0.00 |
| ATOM | 9704 | CA  | THR | C | 320 | 5.545   | 19.517 | -12.583 | 0.00 | 0.00 |
| ATOM | 9718 | CA  | LEU | C | 321 | 3.933   | 20.771 | -9.419  | 0.00 | 0.00 |
| ATOM | 9737 | CA  | LYS | C | 322 | 3.174   | 23.989 | -11.227 | 0.00 | 0.00 |
| ATOM | 9759 | CA  | ALA | C | 323 | 1.880   | 22.335 | -14.434 | 0.00 | 0.00 |
| ATOM | 9769 | CA  | SER | C | 324 | -0.310  | 19.746 | -12.642 | 0.00 | 0.00 |
| ATOM | 9780 | CA  | MET | C | 325 | -1.965  | 22.694 | -10.662 | 0.00 | 0.00 |
| ATOM | 9797 | CA  | ARG | C | 326 | -5.638  | 21.687 | -10.912 | 0.00 | 0.00 |
| ATOM | 9821 | CA  | GLU | C | 327 | -4.651  | 17.931 | -10.564 | 0.00 | 0.00 |
| ATOM | 9836 | CA  | LEU | C | 328 | -2.579  | 18.756 | -7.366  | 0.00 | 0.00 |
| ATOM | 9855 | CA  | GLY | C | 329 | -5.655  | 20.736 | -6.194  | 0.00 | 0.00 |
| ATOM | 9862 | CA  | LEU | C | 330 | -8.059  | 17.700 | -6.753  | 0.00 | 0.00 |
| ATOM | 9881 | CA  | LEU | C | 331 | -5.557  | 15.638 | -4.566  | 0.00 | 0.00 |

|      |       |    |     |   |     |         |        |        |      |      |
|------|-------|----|-----|---|-----|---------|--------|--------|------|------|
| ATOM | 9900  | CA | ILE | C | 332 | -5.945  | 18.174 | -1.654 | 0.00 | 0.00 |
| ATOM | 9919  | CA | PHE | C | 333 | -9.718  | 18.378 | -2.476 | 0.00 | 0.00 |
| ATOM | 9939  | CA | PHE | C | 334 | -10.337 | 14.571 | -2.189 | 0.00 | 0.00 |
| ATOM | 9959  | CA | LEU | C | 335 | -7.945  | 14.358 | 0.862  | 0.00 | 0.00 |
| ATOM | 9978  | CA | PHE | C | 336 | -9.616  | 17.282 | 2.835  | 0.00 | 0.00 |
| ATOM | 9998  | CA | ILE | C | 337 | -13.283 | 16.208 | 2.208  | 0.00 | 0.00 |
| ATOM | 10017 | CA | GLY | C | 338 | -11.869 | 12.585 | 2.790  | 0.00 | 0.00 |
| ATOM | 10024 | CA | VAL | C | 339 | -11.521 | 13.462 | 6.583  | 0.00 | 0.00 |
| ATOM | 10040 | CA | ILE | C | 340 | -14.933 | 15.256 | 6.850  | 0.00 | 0.00 |
| ATOM | 10059 | CA | LEU | C | 341 | -17.087 | 12.530 | 5.359  | 0.00 | 0.00 |
| ATOM | 10078 | CA | PHE | C | 342 | -15.787 | 9.345  | 7.147  | 0.00 | 0.00 |
| ATOM | 10098 | CA | SER | C | 343 | -15.473 | 11.346 | 10.401 | 0.00 | 0.00 |
| ATOM | 10109 | CA | SER | C | 344 | -19.152 | 12.260 | 10.212 | 0.00 | 0.00 |
| ATOM | 10120 | CA | ALA | C | 345 | -20.036 | 8.516  | 9.442  | 0.00 | 0.00 |
| ATOM | 10130 | CA | VAL | C | 346 | -18.026 | 7.563  | 12.675 | 0.00 | 0.00 |
| ATOM | 10146 | CA | TYR | C | 347 | -20.025 | 10.181 | 14.556 | 0.00 | 0.00 |
| ATOM | 10167 | CA | PHE | C | 348 | -23.264 | 8.867  | 13.060 | 0.00 | 0.00 |
| ATOM | 10187 | CA | ALA | C | 349 | -22.260 | 5.178  | 13.651 | 0.00 | 0.00 |
| ATOM | 10197 | CA | GLU | C | 350 | -21.508 | 5.702  | 17.322 | 0.00 | 0.00 |
| ATOM | 10212 | CA | HIS | C | 351 | -24.683 | 6.310  | 19.330 | 0.00 | 0.00 |
| ATOM | 10228 | CA | GLY | C | 352 | -22.936 | 6.310  | 22.664 | 0.00 | 0.00 |
| ATOM | 10235 | CA | SER | C | 353 | -19.853 | 8.367  | 23.555 | 0.00 | 0.00 |
| ATOM | 10246 | CA | ARG | C | 354 | -17.123 | 7.907  | 26.151 | 0.00 | 0.00 |
| ATOM | 10270 | CA | ASP | C | 355 | -15.641 | 11.395 | 26.887 | 0.00 | 0.00 |
| ATOM | 10282 | CA | SER | C | 356 | -15.204 | 13.018 | 23.473 | 0.00 | 0.00 |
| ATOM | 10293 | CA | GLN | C | 357 | -13.896 | 11.820 | 20.091 | 0.00 | 0.00 |
| ATOM | 10310 | CA | PHE | C | 358 | -11.787 | 14.398 | 18.026 | 0.00 | 0.00 |
| ATOM | 10332 | CA | PRO | C | 359 | -10.813 | 17.617 | 20.026 | 0.00 | 0.00 |
| ATOM | 10344 | CA | SER | C | 360 | -9.043  | 19.441 | 17.193 | 0.00 | 0.00 |
| ATOM | 10355 | CA | ILE | C | 361 | -8.793  | 19.339 | 13.395 | 0.00 | 0.00 |
| ATOM | 10376 | CA | PRO | C | 362 | -5.527  | 17.364 | 12.956 | 0.00 | 0.00 |
| ATOM | 10388 | CA | ASP | C | 363 | -7.016  | 14.723 | 15.489 | 0.00 | 0.00 |
| ATOM | 10400 | CA | ALA | C | 364 | -9.524  | 14.132 | 12.790 | 0.00 | 0.00 |
| ATOM | 10410 | CA | PHE | C | 365 | -6.679  | 13.957 | 10.299 | 0.00 | 0.00 |
| ATOM | 10430 | CA | TRP | C | 366 | -4.765  | 11.523 | 12.656 | 0.00 | 0.00 |
| ATOM | 10454 | CA | TRP | C | 367 | -7.709  | 9.177  | 12.576 | 0.00 | 0.00 |
| ATOM | 10478 | CA | ALA | C | 368 | -8.751  | 9.519  | 8.918  | 0.00 | 0.00 |
| ATOM | 10488 | CA | VAL | C | 369 | -5.519  | 10.038 | 6.795  | 0.00 | 0.00 |
| ATOM | 10504 | CA | VAL | C | 370 | -3.549  | 7.348  | 8.723  | 0.00 | 0.00 |
| ATOM | 10520 | CA | SER | C | 371 | -6.565  | 4.892  | 7.981  | 0.00 | 0.00 |
| ATOM | 10531 | CA | MET | C | 372 | -6.993  | 6.200  | 4.306  | 0.00 | 0.00 |
| ATOM | 10548 | CA | THR | C | 373 | -3.300  | 5.988  | 3.471  | 0.00 | 0.00 |
| ATOM | 10562 | CA | THR | C | 374 | -3.205  | 2.367  | 4.826  | 0.00 | 0.00 |
| ATOM | 10576 | CA | VAL | C | 375 | -0.499  | 3.070  | 7.451  | 0.00 | 0.00 |
| ATOM | 10592 | CA | GLY | C | 376 | -1.536  | 2.293  | 10.947 | 0.00 | 0.00 |
| ATOM | 10599 | CA | TYR | C | 377 | 0.294   | 2.970  | 14.143 | 0.00 | 0.00 |
| ATOM | 10620 | CA | GLY | C | 378 | -2.171  | 1.728  | 16.748 | 0.00 | 0.00 |
| ATOM | 10627 | CA | ASP | C | 379 | -3.045  | 4.703  | 18.929 | 0.00 | 0.00 |
| ATOM | 10639 | CA | MET | C | 380 | -5.889  | 6.811  | 17.401 | 0.00 | 0.00 |
| ATOM | 10656 | CA | VAL | C | 381 | -7.946  | 4.002  | 15.766 | 0.00 | 0.00 |
| ATOM | 10674 | CA | PRO | C | 382 | -11.826 | 3.823  | 16.125 | 0.00 | 0.00 |
| ATOM | 10686 | CA | THR | C | 383 | -13.981 | 2.923  | 19.198 | 0.00 | 0.00 |
| ATOM | 10700 | CA | THR | C | 384 | -17.075 | 0.703  | 18.384 | 0.00 | 0.00 |
| ATOM | 10714 | CA | ILE | C | 385 | -17.929 | -2.204 | 16.053 | 0.00 | 0.00 |
| ATOM | 10733 | CA | GLY | C | 386 | -19.769 | 0.669  | 14.272 | 0.00 | 0.00 |
| ATOM | 10740 | CA | GLY | C | 387 | -16.616 | 2.859  | 14.109 | 0.00 | 0.00 |
| ATOM | 10747 | CA | LYS | C | 388 | -14.626 | -0.386 | 13.080 | 0.00 | 0.00 |
| ATOM | 10769 | CA | ILE | C | 389 | -17.069 | -0.998 | 10.217 | 0.00 | 0.00 |
| ATOM | 10788 | CA | VAL | C | 390 | -16.531 | 2.755  | 8.970  | 0.00 | 0.00 |
| ATOM | 10804 | CA | GLY | C | 391 | -12.776 | 2.205  | 9.451  | 0.00 | 0.00 |
| ATOM | 10811 | CA | SER | C | 392 | -13.015 | -0.742 | 7.065  | 0.00 | 0.00 |
| ATOM | 10822 | CA | LEU | C | 393 | -14.786 | 1.296  | 4.367  | 0.00 | 0.00 |
| ATOM | 10841 | CA | CYS | C | 394 | -12.344 | 4.255  | 5.110  | 0.00 | 0.00 |
| ATOM | 10852 | CA | ALA | C | 395 | -9.343  | 2.098  | 4.234  | 0.00 | 0.00 |

|      |       |     |     |   |     |         |        |         |      |      |
|------|-------|-----|-----|---|-----|---------|--------|---------|------|------|
| ATOM | 10862 | CA  | ILE | C | 396 | -10.599 | 0.362  | 1.031   | 0.00 | 0.00 |
| ATOM | 10881 | CA  | ALA | C | 397 | -12.252 | 3.505  | -0.561  | 0.00 | 0.00 |
| ATOM | 10891 | CA  | GLY | C | 398 | -9.331  | 5.738  | 0.896   | 0.00 | 0.00 |
| ATOM | 10898 | CA  | VAL | C | 399 | -6.546  | 4.052  | -1.029  | 0.00 | 0.00 |
| ATOM | 10914 | CA  | LEU | C | 400 | -8.427  | 4.108  | -4.304  | 0.00 | 0.00 |
| ATOM | 10933 | CA  | THR | C | 401 | -9.754  | 7.722  | -4.213  | 0.00 | 0.00 |
| ATOM | 10947 | CA  | ILE | C | 402 | -6.562  | 9.504  | -3.216  | 0.00 | 0.00 |
| ATOM | 10966 | CA  | ALA | C | 403 | -4.665  | 7.564  | -5.953  | 0.00 | 0.00 |
| ATOM | 10976 | CA  | LEU | C | 404 | -6.993  | 8.445  | -8.904  | 0.00 | 0.00 |
| ATOM | 10997 | CA  | PRO | C | 405 | -5.663  | 12.002 | -9.651  | 0.00 | 0.00 |
| ATOM | 11009 | CA  | VAL | C | 406 | -2.018  | 10.671 | -9.149  | 0.00 | 0.00 |
| ATOM | 11027 | CA  | PRO | C | 407 | -1.635  | 9.019  | -12.703 | 0.00 | 0.00 |
| ATOM | 11039 | CA  | VAL | C | 408 | -2.545  | 12.234 | -14.527 | 0.00 | 0.00 |
| ATOM | 11055 | CA  | ILE | C | 409 | 0.428   | 13.898 | -12.593 | 0.00 | 0.00 |
| ATOM | 11074 | CA  | VAL | C | 410 | 2.873   | 11.006 | -13.245 | 0.00 | 0.00 |
| ATOM | 11090 | CA  | SER | C | 411 | 2.043   | 11.328 | -16.910 | 0.00 | 0.00 |
| ATOM | 11101 | CA  | ASN | C | 412 | 2.918   | 15.136 | -16.691 | 0.00 | 0.00 |
| ATOM | 11115 | CA  | PHE | C | 413 | 6.354   | 14.329 | -15.153 | 0.00 | 0.00 |
| ATOM | 11135 | CA  | ASN | C | 414 | 6.930   | 11.864 | -18.080 | 0.00 | 0.00 |
| ATOM | 11149 | CA  | TYR | C | 415 | 6.596   | 14.785 | -20.469 | 0.00 | 0.00 |
| ATOM | 11170 | CA  | PHE | C | 416 | 9.376   | 16.680 | -18.699 | 0.00 | 0.00 |
| ATOM | 11190 | CA  | TYR | C | 417 | 11.661  | 13.668 | -18.210 | 0.00 | 0.00 |
| ATOM | 11211 | CA  | HIS | C | 418 | 11.419  | 12.876 | -21.953 | 0.00 | 0.00 |
| ATOM | 11229 | CA  | ARG | C | 419 | 11.415  | 16.393 | -23.694 | 0.00 | 0.00 |
| ATOM | 11253 | CA  | GLU | C | 420 | 14.320  | 18.884 | -23.186 | 0.00 | 0.00 |
| ATOM | 11268 | CA  | THR | C | 421 | 13.863  | 21.751 | -25.777 | 0.00 | 0.00 |
| ATOM | 13529 | CA  | SER | D | 324 | 17.677  | 1.782  | -14.465 | 0.00 | 0.00 |
| ATOM | 13540 | CA  | MET | D | 325 | 20.513  | 3.734  | -12.751 | 0.00 | 0.00 |
| ATOM | 13557 | CA  | ARG | D | 326 | 19.099  | 7.310  | -13.293 | 0.00 | 0.00 |
| ATOM | 13581 | CA  | GLU | D | 327 | 15.576  | 6.227  | -12.054 | 0.00 | 0.00 |
| ATOM | 13596 | CA  | LEU | D | 328 | 17.213  | 4.688  | -8.983  | 0.00 | 0.00 |
| ATOM | 13615 | CA  | GLY | D | 329 | 19.377  | 7.737  | -8.064  | 0.00 | 0.00 |
| ATOM | 13622 | CA  | LEU | D | 330 | 16.294  | 9.909  | -8.783  | 0.00 | 0.00 |
| ATOM | 13641 | CA  | LEU | D | 331 | 14.260  | 7.561  | -6.524  | 0.00 | 0.00 |
| ATOM | 13660 | CA  | ILE | D | 332 | 16.823  | 7.790  | -3.514  | 0.00 | 0.00 |
| ATOM | 13679 | CA  | PHE | D | 333 | 16.890  | 11.607 | -3.922  | 0.00 | 0.00 |
| ATOM | 13699 | CA  | PHE | D | 334 | 13.074  | 12.067 | -3.412  | 0.00 | 0.00 |
| ATOM | 13719 | CA  | LEU | D | 335 | 13.055  | 9.264  | -0.687  | 0.00 | 0.00 |
| ATOM | 13738 | CA  | PHE | D | 336 | 15.939  | 11.099 | 1.227   | 0.00 | 0.00 |
| ATOM | 13758 | CA  | ILE | D | 337 | 14.722  | 14.681 | 0.759   | 0.00 | 0.00 |
| ATOM | 13777 | CA  | GLY | D | 338 | 11.403  | 13.698 | 2.364   | 0.00 | 0.00 |
| ATOM | 13784 | CA  | VAL | D | 339 | 12.963  | 11.738 | 5.200   | 0.00 | 0.00 |
| ATOM | 13800 | CA  | ILE | D | 340 | 15.679  | 14.431 | 6.103   | 0.00 | 0.00 |
| ATOM | 13819 | CA  | LEU | D | 341 | 12.929  | 17.080 | 5.943   | 0.00 | 0.00 |
| ATOM | 13838 | CA  | PHE | D | 342 | 10.039  | 15.353 | 7.847   | 0.00 | 0.00 |
| ATOM | 13858 | CA  | SER | D | 343 | 12.446  | 13.974 | 10.372  | 0.00 | 0.00 |
| ATOM | 13869 | CA  | SER | D | 344 | 13.862  | 17.533 | 11.023  | 0.00 | 0.00 |
| ATOM | 13880 | CA  | ALA | D | 345 | 10.362  | 18.867 | 11.289  | 0.00 | 0.00 |
| ATOM | 13890 | CA  | VAL | D | 346 | 8.963   | 16.491 | 13.856  | 0.00 | 0.00 |
| ATOM | 13906 | CA  | TYR | D | 347 | 12.231  | 16.200 | 15.878  | 0.00 | 0.00 |
| ATOM | 13927 | CA  | PHE | D | 348 | 12.632  | 19.854 | 16.646  | 0.00 | 0.00 |
| ATOM | 13947 | CA  | ALA | D | 349 | 9.188   | 21.270 | 16.865  | 0.00 | 0.00 |
| ATOM | 13957 | CA  | GLU | D | 350 | 7.060   | 19.675 | 19.748  | 0.00 | 0.00 |
| ATOM | 13970 | N   | HIS | D | 351 | 6.363   | 21.890 | 20.615  | 0.00 | 0.00 |
| ATOM | 13971 | HN  | HIS | D | 351 | 5.606   | 21.842 | 19.969  | 0.00 | 0.00 |
| ATOM | 13972 | CA  | HIS | D | 351 | 6.494   | 22.981 | 21.521  | 0.00 | 0.00 |
| ATOM | 13973 | HA  | HIS | D | 351 | 7.482   | 23.080 | 21.946  | 0.00 | 0.00 |
| ATOM | 13974 | CB  | HIS | D | 351 | 6.303   | 24.312 | 20.773  | 0.00 | 0.00 |
| ATOM | 13975 | HB1 | HIS | D | 351 | 6.544   | 24.176 | 19.697  | 0.00 | 0.00 |
| ATOM | 13976 | HB2 | HIS | D | 351 | 5.259   | 24.688 | 20.836  | 0.00 | 0.00 |
| ATOM | 13977 | ND1 | HIS | D | 351 | 7.634   | 25.652 | 22.511  | 0.00 | 0.00 |
| ATOM | 13978 | CG  | HIS | D | 351 | 7.237   | 25.467 | 21.189  | 0.00 | 0.00 |
| ATOM | 13979 | CE1 | HIS | D | 351 | 8.521   | 26.590 | 22.399  | 0.00 | 0.00 |
| ATOM | 13980 | HE1 | HIS | D | 351 | 9.002   | 27.156 | 23.197  | 0.00 | 0.00 |

|      |       |     |     |   |     |        |        |         |      |      |
|------|-------|-----|-----|---|-----|--------|--------|---------|------|------|
| ATOM | 13981 | NE2 | HIS | D | 351 | 8.772  | 26.963 | 21.208  | 0.00 | 0.00 |
| ATOM | 13982 | CD2 | HIS | D | 351 | 7.928  | 26.254 | 20.427  | 0.00 | 0.00 |
| ATOM | 13983 | HD2 | HIS | D | 351 | 8.009  | 26.380 | 19.354  | 0.00 | 0.00 |
| ATOM | 13984 | C   | HIS | D | 351 | 5.388  | 22.902 | 22.593  | 0.00 | 0.00 |
| ATOM | 13985 | O   | HIS | D | 351 | 4.588  | 22.049 | 22.726  | 0.00 | 0.00 |
| ATOM | 13988 | CA  | GLY | D | 352 | 4.935  | 23.690 | 24.948  | 0.00 | 0.00 |
| ATOM | 13995 | CA  | SER | D | 353 | 7.746  | 22.347 | 27.293  | 0.00 | 0.00 |
| ATOM | 14006 | CA  | ARG | D | 354 | 11.537 | 22.375 | 27.064  | 0.00 | 0.00 |
| ATOM | 14030 | CA  | ASP | D | 355 | 12.094 | 19.087 | 25.339  | 0.00 | 0.00 |
| ATOM | 14042 | CA  | SER | D | 356 | 10.556 | 17.492 | 22.204  | 0.00 | 0.00 |
| ATOM | 14053 | CA  | GLN | D | 357 | 9.179  | 13.933 | 21.669  | 0.00 | 0.00 |
| ATOM | 14070 | CA  | PHE | D | 358 | 11.898 | 11.707 | 20.206  | 0.00 | 0.00 |
| ATOM | 14092 | CA  | PRO | D | 359 | 15.167 | 10.880 | 22.221  | 0.00 | 0.00 |
| ATOM | 14104 | CA  | SER | D | 360 | 17.370 | 11.511 | 19.142  | 0.00 | 0.00 |
| ATOM | 14115 | CA  | ILE | D | 361 | 17.471 | 11.905 | 15.290  | 0.00 | 0.00 |
| ATOM | 14136 | CA  | PRO | D | 362 | 17.873 | 7.958  | 14.560  | 0.00 | 0.00 |
| ATOM | 14148 | CA  | ASP | D | 363 | 14.384 | 7.657  | 16.129  | 0.00 | 0.00 |
| ATOM | 14160 | CA  | ALA | D | 364 | 12.998 | 10.504 | 13.998  | 0.00 | 0.00 |
| ATOM | 14170 | CA  | PHE | D | 365 | 14.626 | 9.109  | 10.776  | 0.00 | 0.00 |
| ATOM | 14190 | CA  | TRP | D | 366 | 13.255 | 5.575  | 11.600  | 0.00 | 0.00 |
| ATOM | 14214 | CA  | TRP | D | 367 | 9.726  | 6.975  | 12.125  | 0.00 | 0.00 |
| ATOM | 14238 | CA  | ALA | D | 368 | 9.822  | 8.998  | 8.921   | 0.00 | 0.00 |
| ATOM | 14248 | CA  | VAL | D | 369 | 11.100 | 6.209  | 6.598   | 0.00 | 0.00 |
| ATOM | 14264 | CA  | VAL | D | 370 | 8.693  | 3.621  | 8.183   | 0.00 | 0.00 |
| ATOM | 14280 | CA  | SER | D | 371 | 5.775  | 5.980  | 7.665   | 0.00 | 0.00 |
| ATOM | 14291 | CA  | MET | D | 372 | 6.924  | 7.280  | 4.273   | 0.00 | 0.00 |
| ATOM | 14308 | CA  | THR | D | 373 | 7.098  | 3.683  | 2.935   | 0.00 | 0.00 |
| ATOM | 14322 | CA  | THR | D | 374 | 3.508  | 3.462  | 4.616   | 0.00 | 0.00 |
| ATOM | 14336 | CA  | VAL | D | 375 | 4.258  | 0.532  | 6.907   | 0.00 | 0.00 |
| ATOM | 14352 | CA  | GLY | D | 376 | 3.729  | 1.887  | 10.493  | 0.00 | 0.00 |
| ATOM | 14359 | CA  | TYR | D | 377 | 4.773  | -0.333 | 13.423  | 0.00 | 0.00 |
| ATOM | 14380 | CA  | GLY | D | 378 | 3.500  | 2.220  | 16.098  | 0.00 | 0.00 |
| ATOM | 14387 | CA  | ASP | D | 379 | 5.240  | 2.968  | 19.380  | 0.00 | 0.00 |
| ATOM | 14399 | CA  | MET | D | 380 | 6.378  | 6.714  | 19.787  | 0.00 | 0.00 |
| ATOM | 14416 | CA  | VAL | D | 381 | 4.321  | 9.298  | 17.747  | 0.00 | 0.00 |
| ATOM | 14434 | CA  | PRO | D | 382 | 3.815  | 13.145 | 18.021  | 0.00 | 0.00 |
| ATOM | 14446 | CA  | THR | D | 383 | 1.532  | 14.991 | 20.385  | 0.00 | 0.00 |
| ATOM | 14460 | CA  | THR | D | 384 | 1.408  | 18.308 | 18.673  | 0.00 | 0.00 |
| ATOM | 14474 | CA  | ILE | D | 385 | -0.991 | 19.896 | 16.138  | 0.00 | 0.00 |
| ATOM | 14493 | CA  | GLY | D | 386 | 1.792  | 20.512 | 13.484  | 0.00 | 0.00 |
| ATOM | 14500 | CA  | GLY | D | 387 | 3.320  | 16.942 | 13.830  | 0.00 | 0.00 |
| ATOM | 14507 | CA  | LYS | D | 388 | -0.145 | 15.548 | 13.055  | 0.00 | 0.00 |
| ATOM | 14529 | CA  | ILE | D | 389 | -0.307 | 17.459 | 9.768   | 0.00 | 0.00 |
| ATOM | 14548 | CA  | VAL | D | 390 | 3.302  | 16.445 | 8.977   | 0.00 | 0.00 |
| ATOM | 14564 | CA  | GLY | D | 391 | 2.498  | 12.729 | 9.603   | 0.00 | 0.00 |
| ATOM | 14571 | CA  | SER | D | 392 | -0.600 | 13.173 | 7.413   | 0.00 | 0.00 |
| ATOM | 14582 | CA  | LEU | D | 393 | 1.905  | 14.815 | 4.899   | 0.00 | 0.00 |
| ATOM | 14601 | CA  | CYS | D | 394 | 4.549  | 11.980 | 5.295   | 0.00 | 0.00 |
| ATOM | 14612 | CA  | ALA | D | 395 | 1.998  | 9.351  | 4.230   | 0.00 | 0.00 |
| ATOM | 14622 | CA  | ILE | D | 396 | 0.767  | 11.569 | 1.258   | 0.00 | 0.00 |
| ATOM | 14641 | CA  | ALA | D | 397 | 4.284  | 12.844 | 0.238   | 0.00 | 0.00 |
| ATOM | 14651 | CA  | GLY | D | 398 | 5.411  | 9.046  | 0.266   | 0.00 | 0.00 |
| ATOM | 14658 | CA  | VAL | D | 399 | 2.817  | 7.847  | -2.226  | 0.00 | 0.00 |
| ATOM | 14674 | CA  | LEU | D | 400 | 3.005  | 11.038 | -4.368  | 0.00 | 0.00 |
| ATOM | 14693 | CA  | THR | D | 401 | 6.847  | 11.475 | -4.806  | 0.00 | 0.00 |
| ATOM | 14707 | CA  | ILE | D | 402 | 8.309  | 8.040  | -4.805  | 0.00 | 0.00 |
| ATOM | 14726 | CA  | ALA | D | 403 | 5.889  | 7.117  | -7.737  | 0.00 | 0.00 |
| ATOM | 14736 | CA  | LEU | D | 404 | 7.433  | 9.296  | -10.472 | 0.00 | 0.00 |
| ATOM | 14757 | CA  | PRO | D | 405 | 10.304 | 6.932  | -11.878 | 0.00 | 0.00 |
| ATOM | 14769 | CA  | VAL | D | 406 | 8.533  | 3.748  | -10.793 | 0.00 | 0.00 |
| ATOM | 14787 | CA  | PRO | D | 407 | 6.547  | 2.992  | -13.960 | 0.00 | 0.00 |
| ATOM | 14799 | CA  | VAL | D | 408 | 9.883  | 3.550  | -15.906 | 0.00 | 0.00 |
| ATOM | 14815 | CA  | ILE | D | 409 | 11.617 | 0.806  | -13.690 | 0.00 | 0.00 |
| ATOM | 14834 | CA  | VAL | D | 410 | 8.452  | -1.357 | -14.141 | 0.00 | 0.00 |

|      |       |    |     |   |     |        |         |         |      |      |
|------|-------|----|-----|---|-----|--------|---------|---------|------|------|
| ATOM | 14850 | CA | SER | D | 411 | 8.551  | -0.675  | -17.966 | 0.00 | 0.00 |
| ATOM | 14861 | CA | ASN | D | 412 | 12.195 | -1.889  | -18.004 | 0.00 | 0.00 |
| ATOM | 14875 | CA | PHE | D | 413 | 11.204 | -4.909  | -15.878 | 0.00 | 0.00 |
| ATOM | 14895 | CA | ASN | D | 414 | 8.420  | -5.923  | -18.341 | 0.00 | 0.00 |
| ATOM | 14909 | CA | TYR | D | 415 | 10.757 | -5.306  | -21.365 | 0.00 | 0.00 |
| ATOM | 14930 | CA | PHE | D | 416 | 13.652 | -7.470  | -19.954 | 0.00 | 0.00 |
| ATOM | 14950 | CA | TYR | D | 417 | 11.085 | -10.013 | -18.698 | 0.00 | 0.00 |
| ATOM | 14971 | CA | HIS | D | 418 | 9.892  | -10.631 | -22.283 | 0.00 | 0.00 |
| ATOM | 14989 | CA | ARG | D | 419 | 13.237 | -10.068 | -24.147 | 0.00 | 0.00 |
| ATOM | 15013 | CA | GLU | D | 420 | 15.418 | -12.485 | -22.288 | 0.00 | 0.00 |
| ATOM | 15028 | CA | THR | D | 421 | 16.251 | -16.193 | -22.506 | 0.00 | 0.00 |
| ATOM | 76785 | ZN | ZN2 | F | 3   | 10.301 | 28.117  | 19.772  | 0.00 | 0.00 |
